# Supplementary material for: Characterization of the differentially methylated region of the Impact gene that exhibits Glires-specific imprinting
Source: PubMed Central journal article supplement (PMC2614492; doi:10.1186/gb-2008-9-11-r160), 2008-11-13
Supplement: gb-2008-9-11-r160-S1.pdf [file gb-2008-9-11-r160-S1.pdf]

Additional data file 1. One-tailed Fisher's exact test and Bonferroni correction for the periodicity of CpG sites

| Distance | Count at a given distance |                           | Count at other distances |                           | Fisher's exact test | Bonferroni correction |
|----------|---------------------------|---------------------------|--------------------------|---------------------------|---------------------|-----------------------|
|          | in the imprinted group    | in the nonimprinted group | in the imprinted group   | in the nonimprinted group | p-value             | p-value               |
| 2        | 51                        | 38                        | 1473                     | 2309                      | 4.0561E-04          | 0.0199                |
| 3        | 17                        | 74                        | 1507                     | 2273                      | 1.0000              | 1.0000                |
| 4        | 32                        | 46                        | 1492                     | 2301                      | 0.4235              | 1.0000                |
| 5        | 28                        | 43                        | 1496                     | 2304                      | 0.5408              | 1.0000                |
| 6        | 41                        | 57                        | 1483                     | 2290                      | 0.3419              | 1.0000                |
| 7        | 22                        | 30                        | 1502                     | 2317                      | 0.3812              | 1.0000                |
| 8        | 54                        | 36                        | 1470                     | 2311                      | 5.0281E-05          | <b>2.4638E-03</b>     |
| 9        | 15                        | 34                        | 1509                     | 2313                      | 0.9226              | 1.0000                |
| 10       | 43                        | 34                        | 1481                     | 2313                      | 2.2864E-03          | 0.1120                |
| 11       | 39                        | 69                        | 1485                     | 2278                      | 0.7882              | 1.0000                |
| 12       | 29                        | 31                        | 1495                     | 2316                      | 0.0978              | 1.0000                |
| 13       | 36                        | 44                        | 1488                     | 2303                      | 0.1770              | 1.0000                |
| 14       | 34                        | 39                        | 1490                     | 2308                      | 0.1253              | 1.0000                |
| 15       | 37                        | 76                        | 1487                     | 2271                      | 0.9421              | 1.0000                |
| 16       | 34                        | 54                        | 1490                     | 2293                      | 0.5970              | 1.0000                |
| 17       | 25                        | 45                        | 1499                     | 2302                      | 0.7737              | 1.0000                |
| 18       | 33                        | 62                        | 1491                     | 2285                      | 0.8515              | 1.0000                |
| 19       | 33                        | 38                        | 1491                     | 2309                      | 0.1328              | 1.0000                |
| 20       | 28                        | 29                        | 1496                     | 2318                      | 0.0845              | 1.0000                |
| 21       | 35                        | 51                        | 1489                     | 2296                      | 0.4401              | 1.0000                |
| 22       | 27                        | 73                        | 1497                     | 2274                      | 0.9968              | 1.0000                |
| 23       | 33                        | 27                        | 1491                     | 2320                      | 9.6964E-03          | 0.4751                |
| 24       | 29                        | 34                        | 1495                     | 2313                      | 0.1680              | 1.0000                |
| 25       | 37                        | 52                        | 1487                     | 2295                      | 0.3718              | 1.0000                |
| 26       | 34                        | 56                        | 1490                     | 2291                      | 0.6611              | 1.0000                |
| 27       | 26                        | 48                        | 1498                     | 2299                      | 0.8081              | 1.0000                |
| 28       | 32                        | 28                        | 1492                     | 2319                      | 0.0189              | 0.9255                |
| 29       | 18                        | 72                        | 1506                     | 2275                      | 1.0000              | 1.0000                |
| 30       | 37                        | 66                        | 1487                     | 2281                      | 0.7955              | 1.0000                |
| 31       | 33                        | 35                        | 1491                     | 2312                      | 0.0767              | 1.0000                |
| 32       | 26                        | 49                        | 1498                     | 2298                      | 0.8316              | 1.0000                |
| 33       | 38                        | 61                        | 1486                     | 2286                      | 0.6183              | 1.0000                |
| 34       | 26                        | 44                        | 1498                     | 2303                      | 0.6920              | 1.0000                |
| 35       | 21                        | 43                        | 1503                     | 2304                      | 0.8882              | 1.0000                |
| 36       | 37                        | 52                        | 1487                     | 2295                      | 0.3718              | 1.0000                |
| 37       | 21                        | 57                        | 1503                     | 2290                      | 0.9927              | 1.0000                |
| 38       | 31                        | 47                        | 1493                     | 2300                      | 0.5162              | 1.0000                |
| 39       | 27                        | 49                        | 1497                     | 2298                      | 0.7905              | 1.0000                |
| 40       | 43                        | 62                        | 1481                     | 2285                      | 0.4046              | 1.0000                |
| 41       | 33                        | 27                        | 1491                     | 2320                      | 9.6964E-03          | 0.4751                |
| 42       | 29                        | 44                        | 1495                     | 2303                      | 0.5198              | 1.0000                |
| 43       | 21                        | 49                        | 1503                     | 2298                      | 0.9612              | 1.0000                |
| 44       | 31                        | 41                        | 1493                     | 2306                      | 0.2980              | 1.0000                |
| 45       | 35                        | 47                        | 1489                     | 2300                      | 0.3044              | 1.0000                |
| 46       | 31                        | 38                        | 1493                     | 2309                      | 0.2028              | 1.0000                |
| 47       | 24                        | 46                        | 1500                     | 2301                      | 0.8419              | 1.0000                |
| 48       | 25                        | 51                        | 1499                     | 2296                      | 0.9018              | 1.0000                |
| 49       | 27                        | 74                        | 1497                     | 2273                      | 0.9975              | 1.0000                |
| 50       | 26                        | 45                        | 1498                     | 2302                      | 0.7242              | 1.0000                |
